# Supplementary material for: TCF7L2 promotes abdominal aortic aneurysm through smooth muscle cell–mediated extracellular matrix remodeling
Source: JCI journal article supplement (doi:10.1172/jci.insight.195681), 2026-04-30

Full unedited blot for Figure 4e

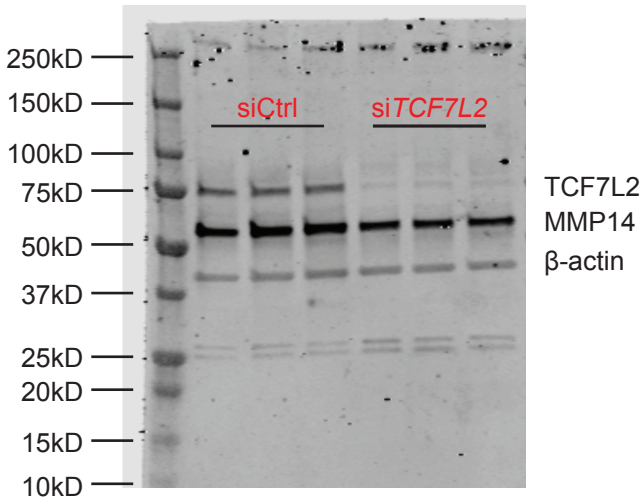

Full unedited blot for Figure 4g

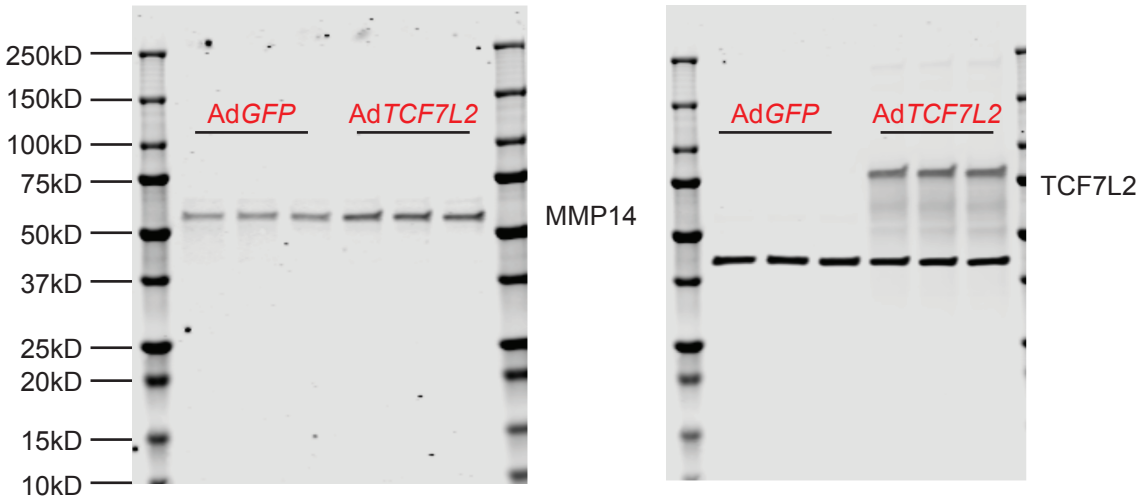

Full unedited blot for Figure 5d

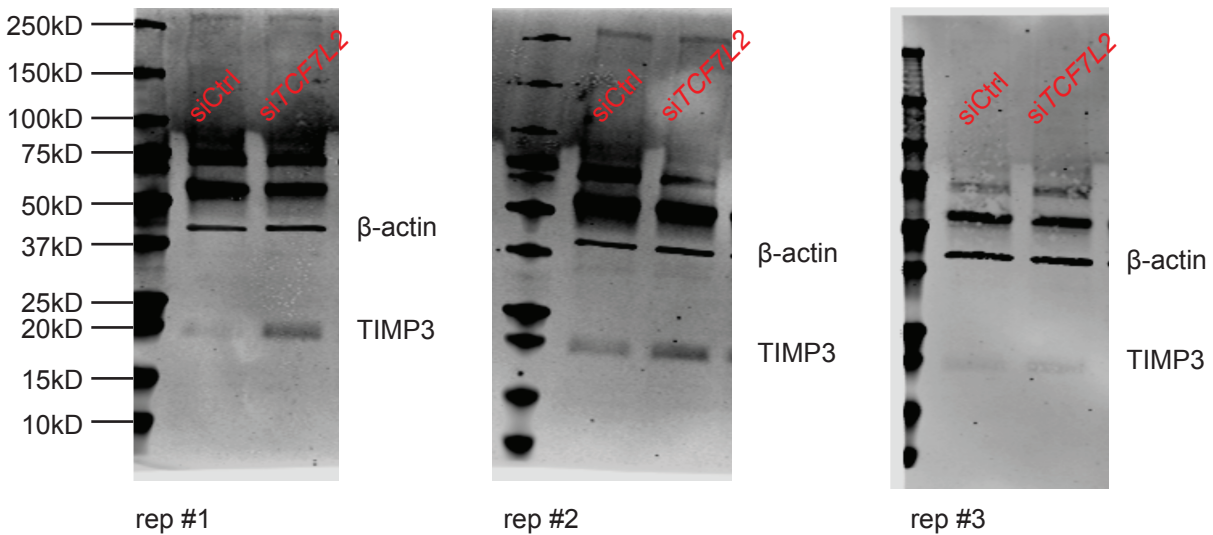

Full unedited blot for Figure 5f

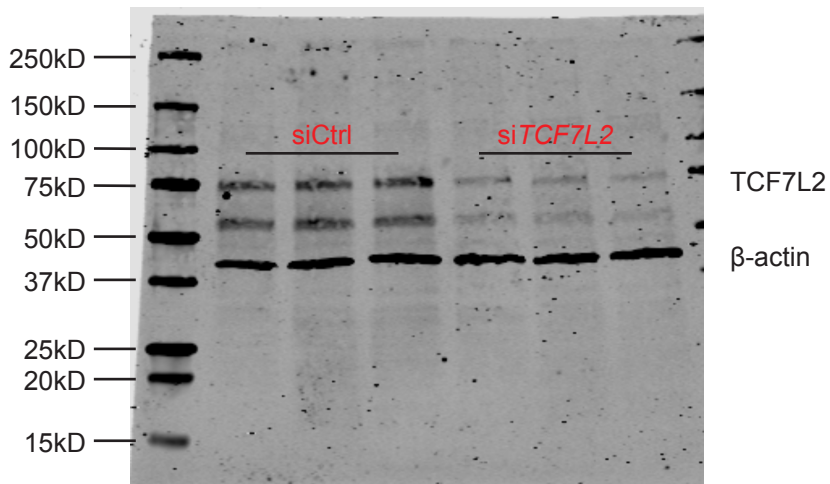

Full unedited blot for Figure 6f

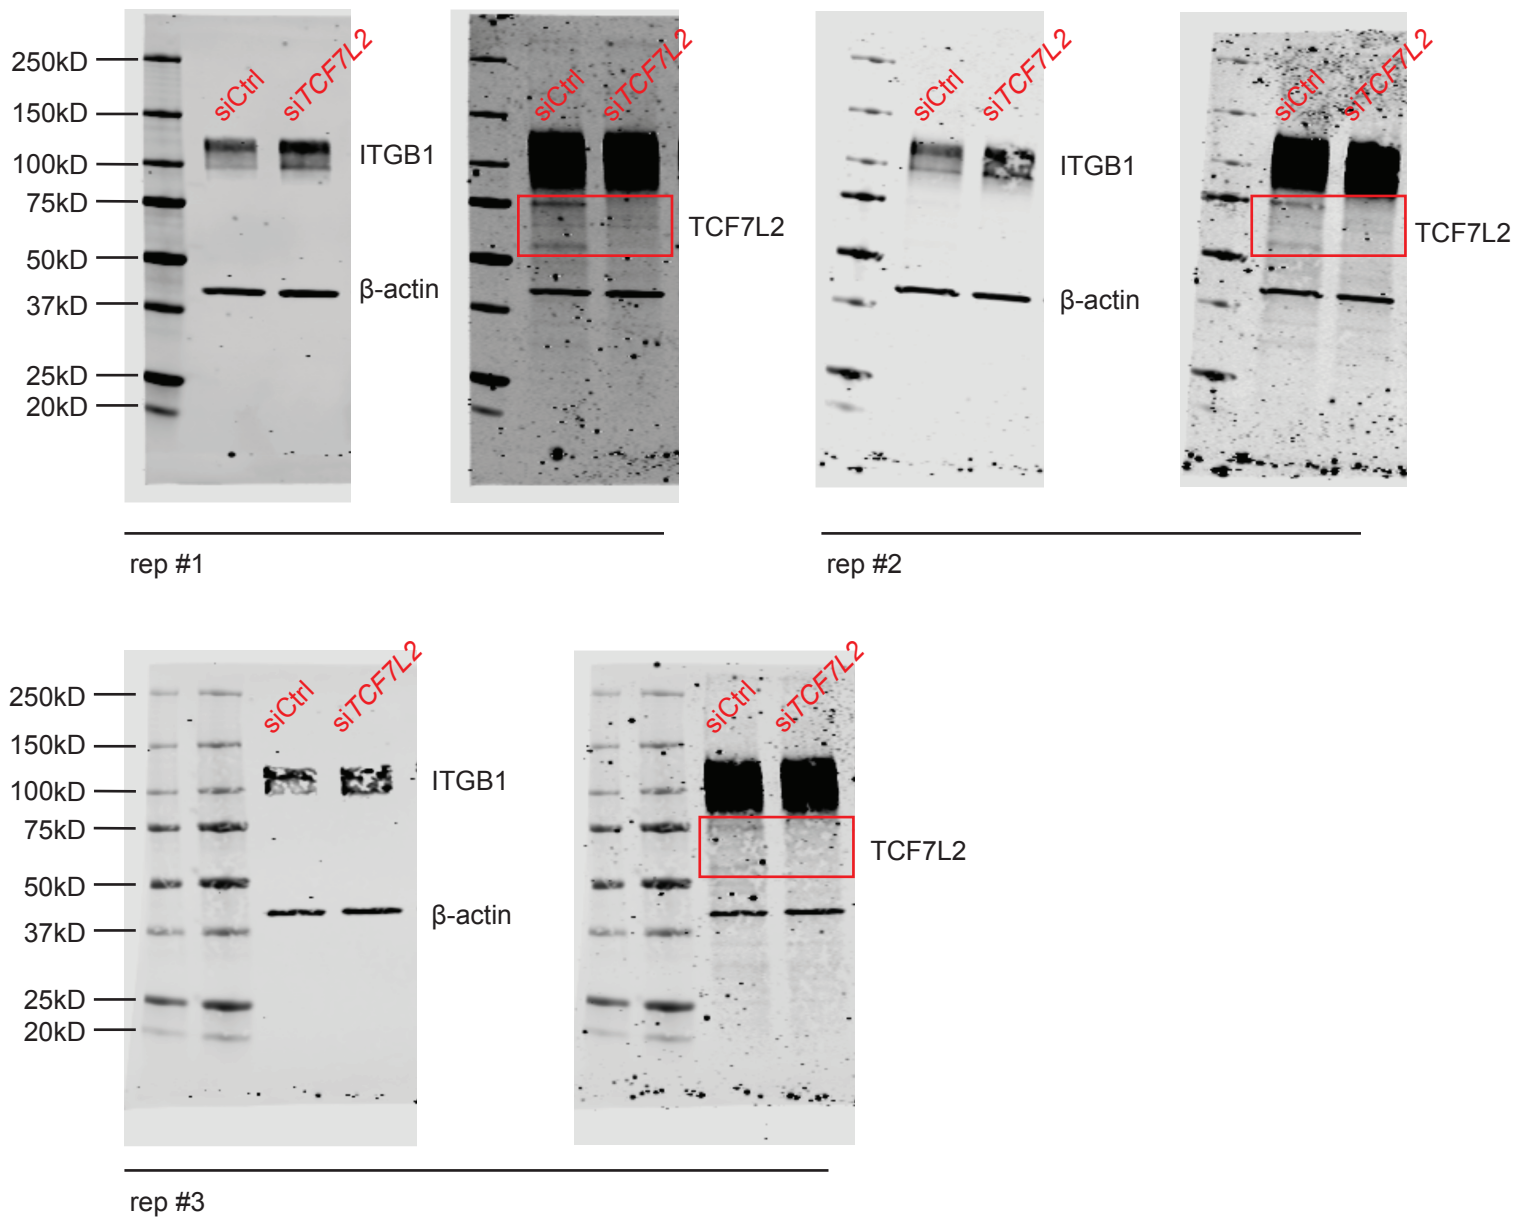

Full unedited blot for Figure 6i

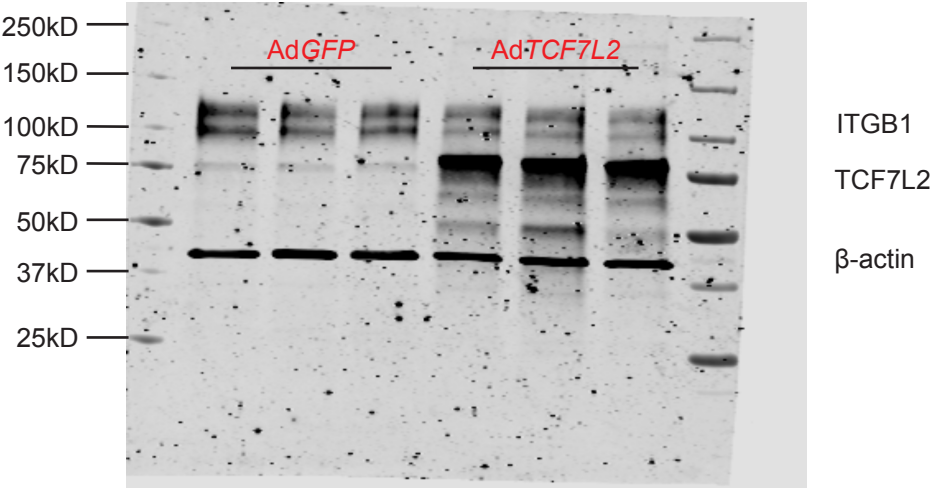

Full unedited blot for Supplemental Figure 2c

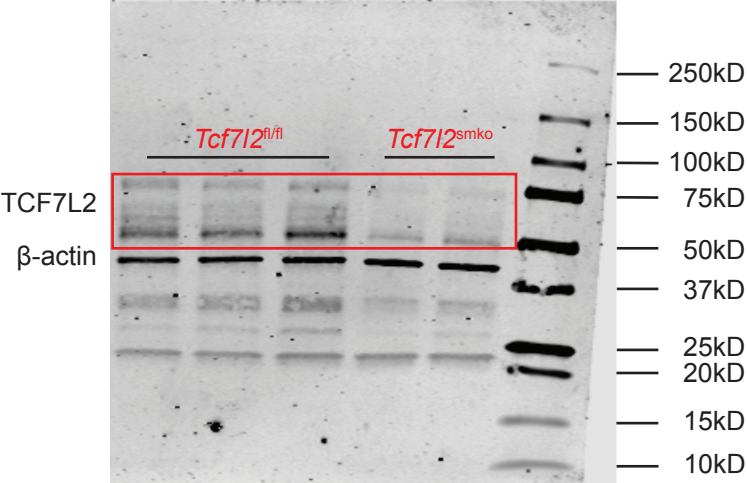

Supplement: sd1 [file 1]
